# Supplementary material for: Glucose oxidase kinetics using MnO2nanosheets: confirming Michaelis–Menten kinetics and quantifying decreasing enzyme performance with increasing buffer concentration
Source: Royal Society of Chemistry journal article supplement (doi:10.1039/d1na00311a), 2021-01-01

Received 00th January 20xx,  
Accepted 00th January 20xx

DOI: 10.1039/x0xx00000x

## Glucose Oxidase Kinetics using $\text{MnO}_2$ Nanosheets: Confirming Michaelis – Menten Kinetics and Quantifying Decreasing Enzyme Performance with Increasing Buffer Concentration

Mahip Singh, ‡<sup>a</sup> Ungku Zoe Anysa Ungku Faiz, ‡<sup>a</sup> Steven Gravelins,<sup>a</sup> Yoshinori Suganuma,<sup>a</sup>  
Nicholas Konstantine Kotoulas,<sup>a</sup> Mark Croxall,<sup>a</sup> Ahlia Khan - Trottier,<sup>b</sup> Cynthia Goh,<sup>a</sup> and Al - Amin Dhirani,<sup>a,c, †</sup>

a. Department of Chemistry, University of Toronto, Ontario, Canada, M5S 3H6

b. Department of Biochemistry, University of Toronto, Ontario, Canada, M5S 3H6

c. Department of Physics, University of Toronto, Toronto, Ontario, Canada, M5S 3H6

‡ These authors contributed equally

† E-mail: [a.dhirani@utoronto.ca](mailto:a.dhirani@utoronto.ca)

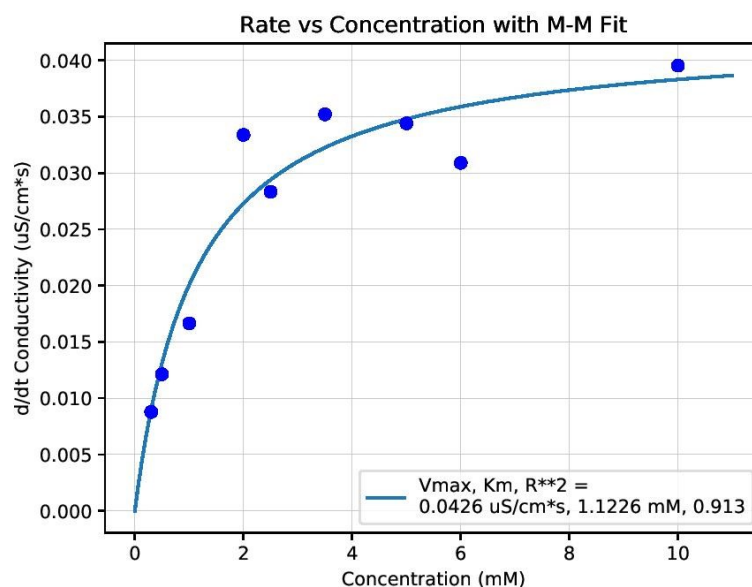

**Fig. S1** Initial rate vs glucose concentration obtained by analyzing real-time kinetics data for the reaction shown in Scheme 3. The data are obtained using a UNS-Tech conductivity meter to monitor changes in conductivity arising from the production of gluconic acid ( $\text{H}^+$ ) with no buffer.

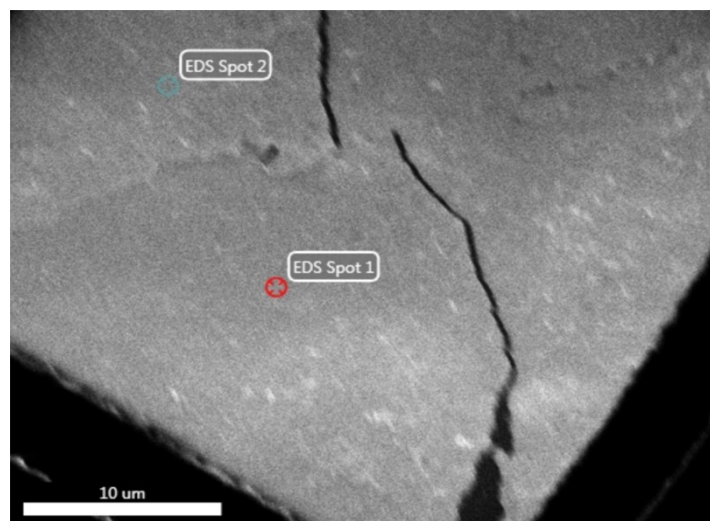

Fig. S2 ESEM image of MnO<sub>2</sub> Thick film used for EDS.

EDS Spot 1:

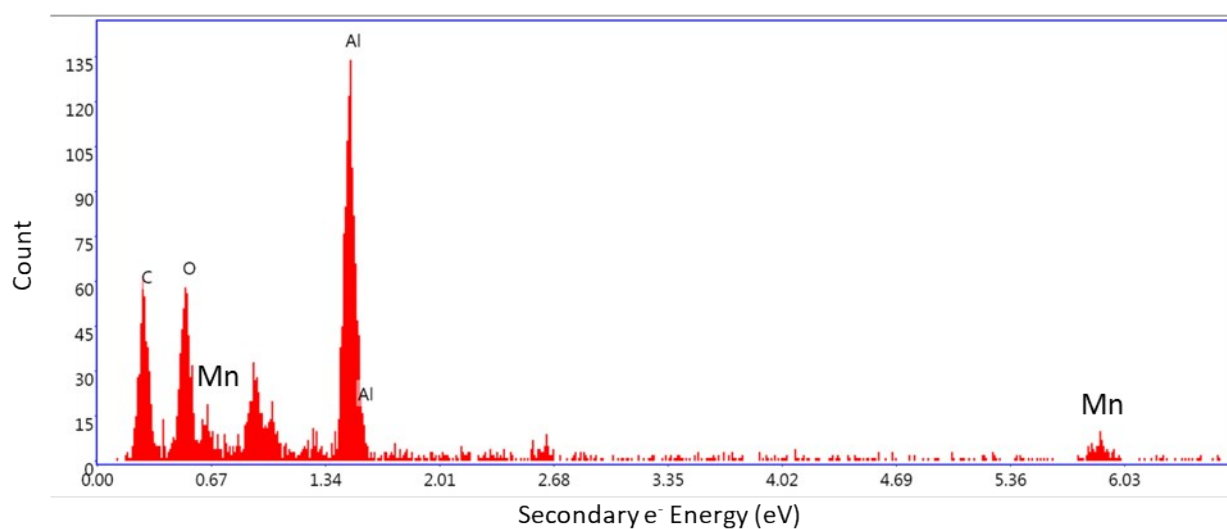

Fig. S3 EDS Spectra of MnO<sub>2</sub> thick film. Accelerating voltage of 10KeV was used. Al present due to sample holder, C present due to STEM grid. MnO<sub>2</sub> is relatively transparent to E-beam, so a thick film was needed to obtain spectra with appropriately high count. Characteristic Mn K $\alpha$  seen centred at 5.9eV and L $\alpha$  at 0.637eV

## EDS Spot 2:

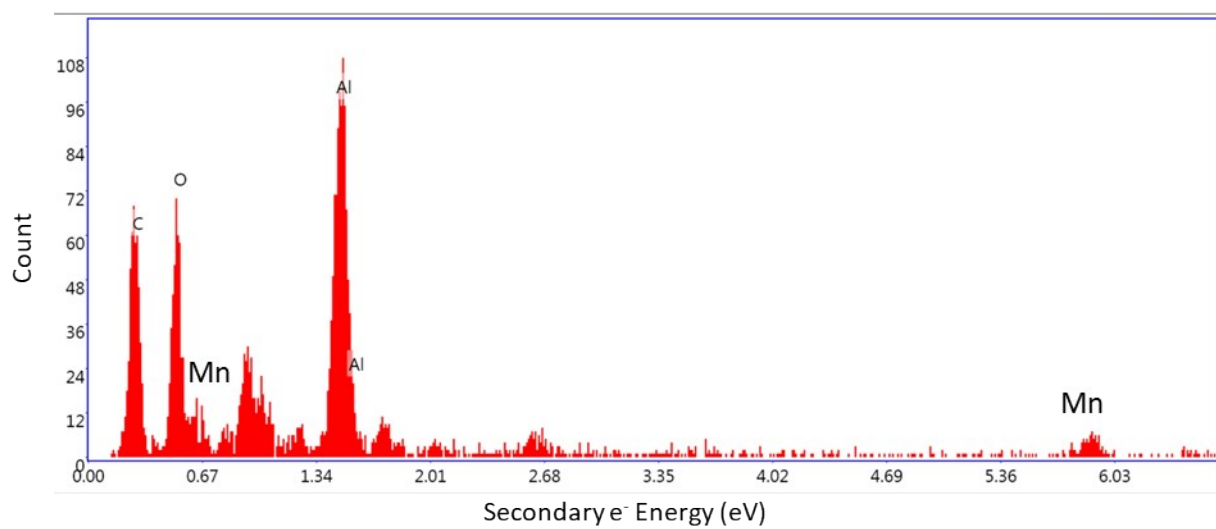

Supplement: d1na00311a1.pdf [file d1na00311a1.pdf]
